# Supplementary material for: Proton conductivity in the Gd2O3–HfO2 system
Source: Royal Society of Chemistry journal article supplement (doi:10.1039/d4nj05306k), 2025-01-01
Supplement: d4nj05306k1.pdf [file d4nj05306k1.pdf]

### Supplementary materials

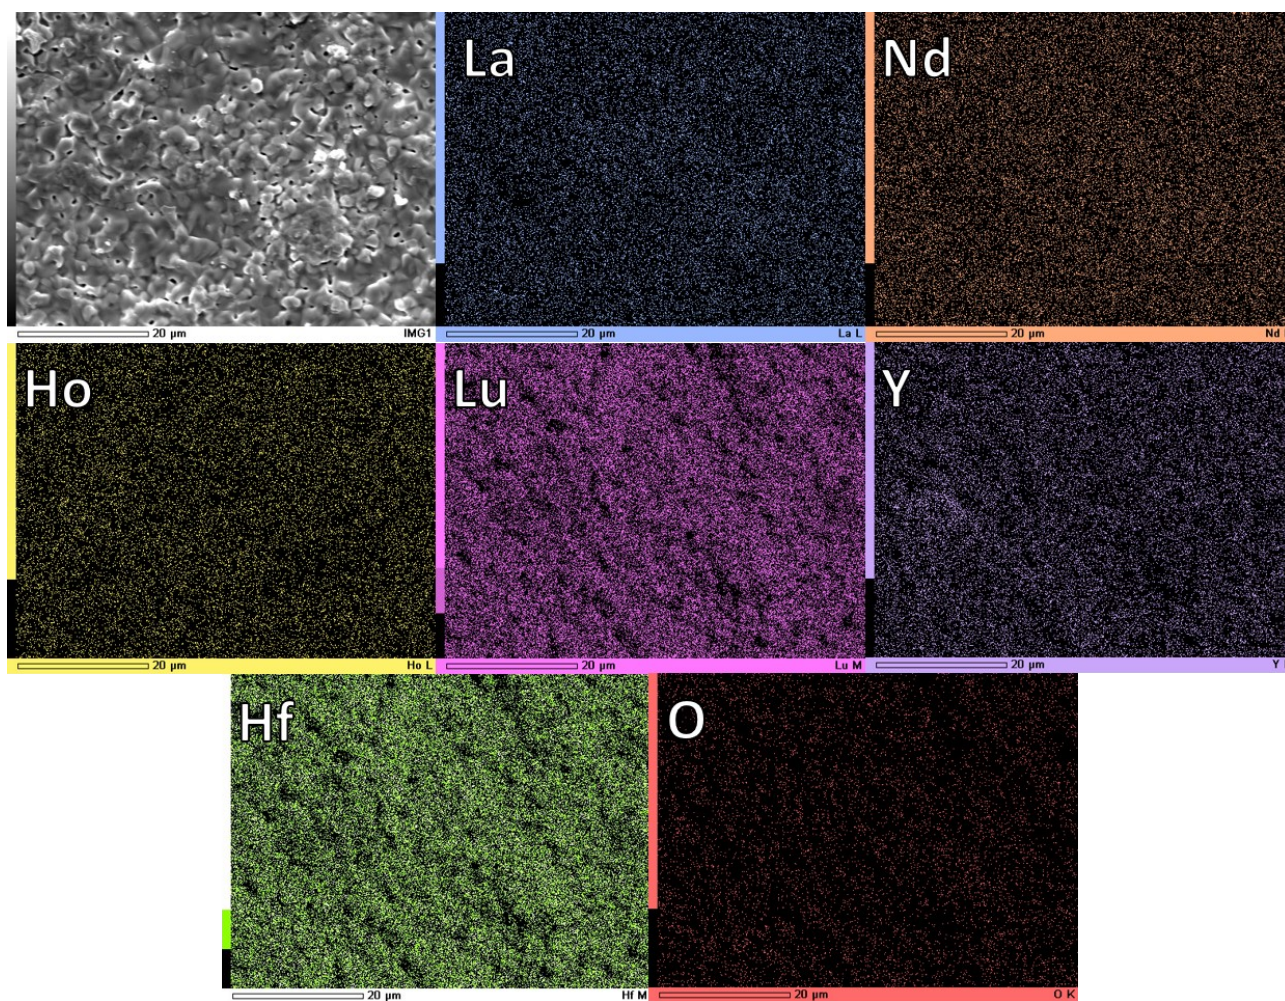

Figure S1a. SEM image and X-ray maps of La, Nd, Ho, Lu, Y, Hf, and O of  $(La_{0.2}Nd_{0.2}Ho_{0.2}Lu_{0.2}Y_{0.2})_2HfO_5$ , fluorite based HEO composite, synthesized at 1610 °C.

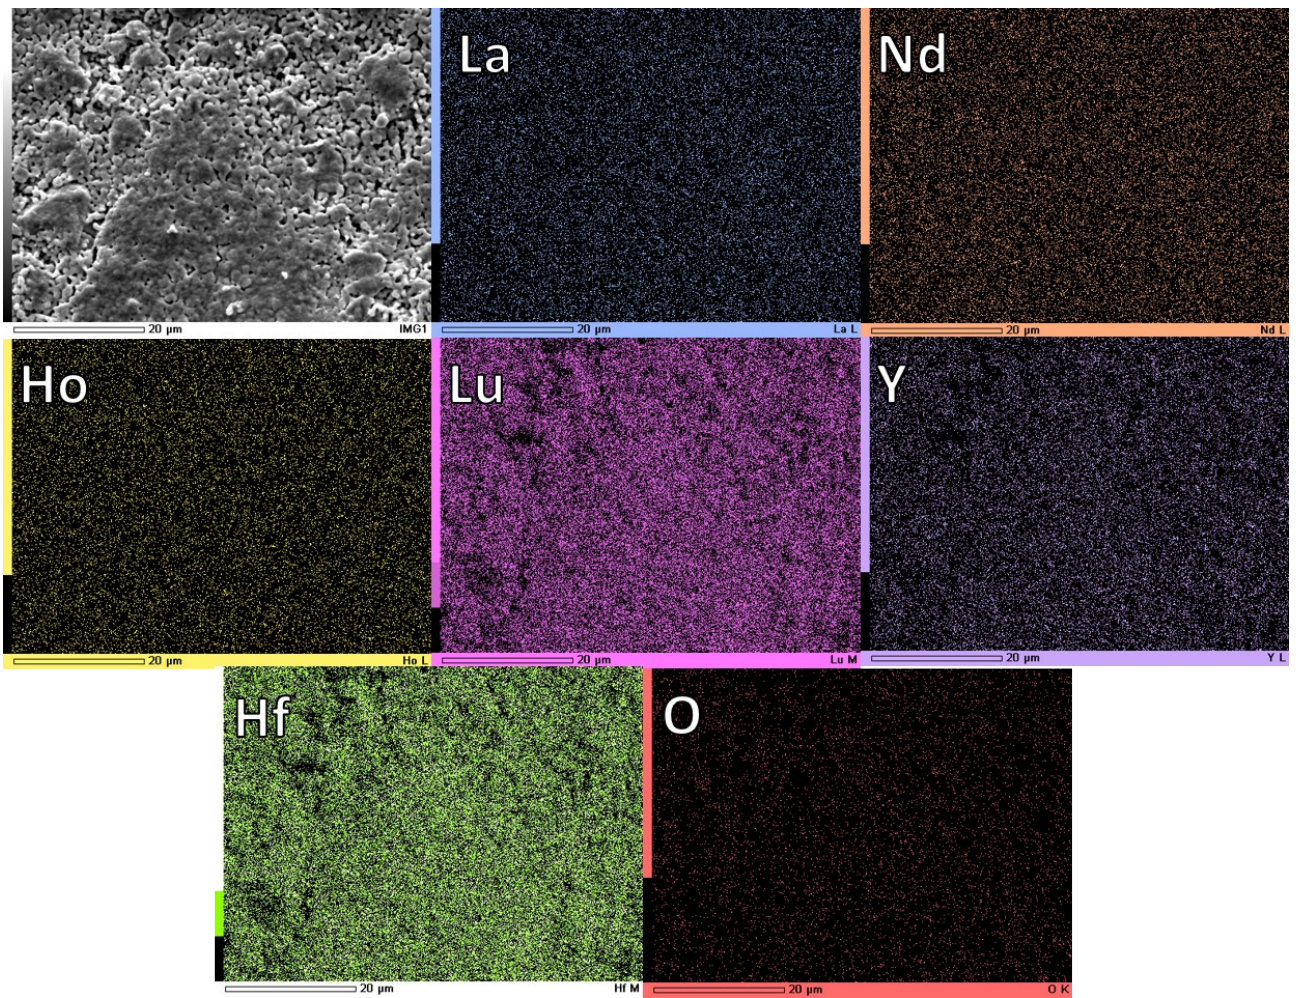

Figure S1b. SEM image and X-ray maps of La, Nd, Ho, Lu, Y, Hf, and O of  $(La_{0.2}Nd_{0.2}Ho_{0.2}Lu_{0.2}Y_{0.2})_2Hf_2O_7$ , pyrochlore-based HEO composite, synthesized at 1600°C, 4h.

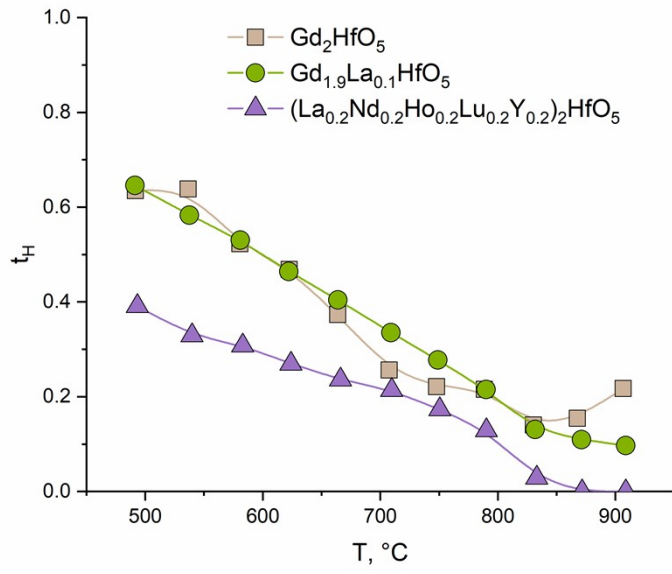

Fig. S2. Proton transfer coefficients in  $\text{Gd}_2\text{HfO}_5$ ,  $\text{Gd}_{1.9}\text{La}_{0.1}\text{HfO}_5$ ,  $(\text{La}_{0.2}\text{Nd}_{0.2}\text{Ho}_{0.2}\text{Lu}_{0.2}\text{Y}_{0.2})_2\text{HfO}_5$  ceramics.
